1 ***RAB18* is a key regulator of GalNAc conjugated siRNA induced silencing in Hep3B**  
2 **cells**

3 Jiamiao Lu\*, Elissa Swearingen, Miki Hardy, Patrick Collins, Bin Wu, Eric Yuan, Daniel Lu, Chi-Ming Li,  
4 Songli Wang, and Michael Ollmann\*

5 Genome Analysis Unit, Amgen Global Research, South San Francisco, USA

6 1120 Veteran Blvd

7 ASF1

8 South San Francisco, CA94080

9

10 \*Correspondence Authors:

11 Jiamiao Lu PhD

12 Email: [jlu01@amgen.com](mailto:jlu01@amgen.com)

13 Michael Ollmann PhD

14 Email: [mikeollmann@yahoo.com](mailto:mikeollmann@yahoo.com)

15

16 **ABSTRACT**

17 Small interfering RNAs (siRNA) therapeutics have developed rapidly in recent years, despite the challenges  
18 associated with delivery of large, highly charged nucleic acids. Delivery of siRNA therapeutics to the liver

19 has been established, with conjugation of siRNA to N-acetylgalactosamine (GalNAc) providing durable  
20 gene knockdown in hepatocytes following subcutaneous injection. GalNAc binds the asialoglycoprotein  
21 receptor (ASGPR) that is highly expressed on hepatocytes and exploits this scavenger receptor to deliver  
22 siRNA across the plasma membrane by endocytosis. However, siRNA needs to access the RNA-induced  
23 silencing complex (RISC) in the cytoplasm to provide effective gene knockdown and the entire siRNA  
24 delivery process is very inefficient, likely due to steps required for endosomal escape, intracellular  
25 trafficking, and stability of siRNA. To reveal the cellular factors limiting delivery of siRNA therapeutics, we  
26 performed a pooled, genome wide knockout screen based on delivery of GalNAc conjugated siRNA  
27 targeting the *HPRT1* gene in the human hepatocellular carcinoma line Hep3B. Our primary pooled genome  
28 wide knockout screen identified candidate genes that when knocked out significantly enhanced siRNA  
29 efficacy in Hep3B cells. Follow-up studies indicate that knockout of one gene in particular, *RAB18*,  
30 improved siRNA efficacy.

## 31 INTRODUCTION

32 siRNAs are short (20~25 base pairs), double-stranded RNA molecules that operate through the RNA  
33 interference (RNAi) pathway to specifically degrade target gene mRNA<sup>1</sup>. The therapeutic potential of  
34 siRNAs has been intensively investigated in recent years to treat a wide range of human diseases.  
35 Compared with traditional drug molecules, siRNAs are highly potent and capable to act on previously  
36 “non-druggable” targets<sup>2-4</sup>. More impressively, the duration of siRNA conjugate mediated potent mRNA  
37 knockdown has been shown to last for several months<sup>2-5</sup>.

38 Despite their substantial therapeutic potential, siRNA therapeutics are associated with challenges  
39 associated with the delivery of large, highly negatively charged nucleic acids into cells. Delivery of siRNA  
40 therapeutics to the liver has been established, with conjugation of siRNA to GalNAc providing durable  
41 gene knockdown in hepatocytes following subcutaneous injection<sup>6-8</sup>. On hepatocytes, GalNAc binds the

42 highly expressed scavenger receptor, ASGPR, to deliver siRNA across the plasma membrane by clathrin-  
43 coated endosomes<sup>9-11</sup>. The human ASGPR exists as hetero-oligomers formed by two subunits: the major  
44 ASGR1 (asialoglycoprotein receptor 1) subunit and the minor ASGR2 (asialoglycoprotein receptor 2), with  
45 the ASGR1 subunit being critical for efficient GalNAc conjugated siRNA delivery<sup>12-14</sup>. Although GalNAc  
46 conjugation improves siRNA delivery, it is still an inefficient process<sup>15,16</sup>.

47 As endosomes mature, the internal pH drops and causes GalNAc conjugated siRNAs to be released from  
48 ASGPR. The ASGPR receptors then quickly recycle back to the cell surface, while GalNAc conjugated siRNAs  
49 remain inside the endosome<sup>15</sup>. The endosomal glycosidase then works to cleave GalNAc from siRNA  
50 conjugates<sup>15</sup>. Less than 1% of the remaining free siRNAs are capable of escape from endosomes through  
51 an unknown mechanism and have access to RISC in the cytoplasm to provide effective gene knockdown  
52 and induce RNAi responses in the cytoplasm<sup>16</sup>. After siRNA enters the cell, it remains inactive until  
53 becomes loaded into the core component of RISC. The passenger (sense) strand is cleaved and ejected at  
54 Argonaute 2 (Ago2), and the guide (antisense) strand is then bound to catalytic Ago2<sup>17,18</sup>. The siRNA guide  
55 strand then guides and aligns the RISC complex on the target mRNA and induces cleavage of the target  
56 mRNA through the catalytic function of Ago2. The siRNA intracellular trafficking and escape steps are very  
57 inefficient, and the underlying mechanisms are not fully understood<sup>15,19</sup>.

58 In recent years, adaptation of the bacterial CRISPR-Cas9 (Clustered Regularly Interspaced Short  
59 Palindromic Repeats-CRISPR-Associated Protein 9) system to mammalian cells have enabled genome wide  
60 loss-of-function screens to identify new biological mechanisms<sup>20-24</sup>. To reveal the cellular factors limiting  
61 delivery of siRNA therapeutics, we performed a pooled, genome wide CRISPR-Cas9 screen (referred as  
62 CRISPR screen in the rest of this article) based on delivery of GalNAc conjugated siRNA targeting the *HPRT1*  
63 gene in the human hepatocellular carcinoma line Hep3B. Multiple candidate genes that when knocked  
64 out significantly enhance siRNA efficacy in Hep3B cells were identified from the CRISPR screen. A

65 secondary, arrayed CRISPR screen using multiplexed synthetic gRNA in 96/384-well format was then used  
66 to validate these candidate genes. Additional follow-up studies of one top candidate gene, *RAB18*, indicate  
67 that knocking out *RAB18* improves siRNA silencing potency at the mRNA level. The results of this study  
68 provide insights into mechanisms of siRNA delivery to both hepatic and extrahepatic tissues.

## 69 RESULTS

### 70 Hep3B cells demonstrated robust GalNAc conjugated siRNA induced silencing

71 An ideal system for identifying key regulators of GalNAc conjugated siRNA induced silencing would have  
72 the following attributes: 1) long-term maintenance; 2) stable Cas9 expression; 3) capability of gRNA  
73 lentivirus library transduction; and 4) sufficient siRNA induced silencing to allow ranking of candidate  
74 genes. Human primary hepatocytes have been proven to uptake GalNAc conjugated siRNA through cell  
75 surface ASGPR<sup>9-11</sup>. However, large scale CRISPR screens have been challenging in human primary  
76 hepatocytes due to their limited proliferative potential. We therefore explored the possibility of using  
77 human hepatocellular carcinoma cell lines such as HepG2 or Hep3B to perform our CRISPR screen.  
78 Although both HepG2 and Hep3B cells express high levels of *ASGR1* and *ASGR2* (Supplementary Table 1),  
79 only Hep3B cells displayed robust knockdown of target genes through GalNAc conjugated siRNA induced  
80 silencing in our hands (Figure 1a, Supplementary Table 2). GalNAc conjugated siRNA was able to induce  
81 target gene knockdown in Hep3B cell line in a dose dependent manner, and the level of silencing was  
82 sufficient to perform the CRISPR screen.

83 To further validate whether GalNAc conjugated siRNA induced silencing in Hep3B is mediated through  
84 *ASGR1*, an antibody blocking test was performed (Figure 1b). To perform this experiment, Hep3B cells  
85 were first pre-incubated with an in-house generated, anti-*ASGR1* antibody (7E11), or no antibody  
86 treatment as control for half an hour, followed by treatment with GalNAc conjugated siRNA targeting

87 *HPRT1* (GalNAc-*HPRT1* siRNA: 8172) (Supplementary Table 2) at multiple doses. The target gene (*HPRT1*)  
88 mRNA levels were measured on day 4 post-siRNA treatment through ddPCR (digital droplet polymerase  
89 chain reaction) analysis. As indicated in Figure 1b, application of the ASGR1 specific antibody was able to  
90 mitigate the siRNA silencing efficacy (13-fold higher IC50 for no antibody (5404nM) relative to anti-ASGR1  
91 (407.7nM).

92 After establishing the suitability of Hep3B for GalNAc conjugated siRNA induced silencing, we then  
93 generated Hep3B cells stably expressing Cas9. The editing capability of the Cas9 stable Hep3B was assayed  
94 through validating their editing efficacy on two target genes, *SLC3A2* and *ASGR1* (Supplementary Table 3  
95 and Supplementary Figure 1). The Cas9 stable Hep3B cells (referred as Hep3BCas9 in the rest of this article)  
96 were then used to perform the CRISPR screen to search for key regulators of GalNAc conjugated siRNA  
97 induced silencing.

#### 98 **HPRT1-6TG (6-thioguanine) live/dead selection based CRISPR screen in Hep3BCas9 cells**

99 A CRISPR knockout screen based on live/dead selection is the most efficient and convenient systematic  
100 experiment to identify potential regulators of siRNA efficacy. We therefore chose to take advantage of  
101 the established HPRT1-6TG based live/dead selection system for this CRISPR screen to look for key  
102 regulators of GalNAc conjugated siRNA induced silencing. 6-thioguanine (6TG), a purine analog, is  
103 incorporated into DNA and RNA resulting in cell death after being phosphorylated by hypoxanthine  
104 phosphoribosyl transferase (HPRT) encoded in humans by the *HPRT1* gene<sup>25</sup>. Knocking down or knocking  
105 out *HPRT1* provides resistance to 6TG and allows those cells to survive. One thing to keep in mind when  
106 utilizing HPRT1-6TG live/dead selection system is that mismatch repair defective cells and cells with *HPRT1*  
107 mutations might also be resistant to 6TG<sup>26</sup>, necessitating independent validation of candidates identified  
108 using this method. Based on this theory, a GalNAc conjugated siRNA targeting human *HPRT1* incorporating  
109 Fluoro (F) and Methoxy (OMe) modifications (Supplementary Table 2), GalNAc-*HPRT1* siRNA (8172), was

110 designed and validated. If GalNAc-*HPRT1* siRNA can enter the cells and induce *HPRT1* gene silencing, these  
111 cells would be able to survive in the presence of 6TG. Otherwise the cells would be killed by 6TG selection  
112 if GalNAc-*HPRT1* siRNA does not silence *HPRT1*. Under the CRISPR knockout condition, if a gene is normally  
113 required for siRNA activity, knocking out this gene would diminish or abolish siRNA function and cause the  
114 cells to be eliminated by 6TG selection. Alternatively, if a gene normally functions to inhibit or block siRNA  
115 activity, knocking out this gene would improve siRNA potency and enable the cells to survive 6TG  
116 selection. Therefore, when sequencing gRNAs in surviving cells, the enriched gRNAs reflect genes that  
117 may normally inhibit siRNA activity, while gRNAs targeting genes essential for siRNA function would be  
118 depleted. However, other gRNAs targeting genes that impact cell viability through non-siRNA related  
119 mechanisms would also be depleted from live cell population, making it difficult to identify siRNA essential  
120 genes from the depleted gRNA population. We therefore chose to focus on analyzing the enriched gRNAs  
121 from surviving cells to enable us to identify genes that inhibit GalNAc conjugated siRNA induced silencing  
122 in Hep3B.

123 We first established the baseline 6TG kill curve in Hep3BCas9 cells without siRNA treatment (Figure 1c).  
124 To avoid both insufficient and excessive killing caused by 6TG, we performed a small-scale pilot run using  
125 100  $\mu$ M 6TG ( $\sim$ IC70) (Figure 1d) and 20  $\mu$ M 6TG ( $\sim$ IC50) (Supplementary Figure 2). An 80k genome wide  
126 CRISPR gRNA lentivirus library (CRISPR KOHW 80K (lot#17050301), Collecta, Mountain View, CA) was  
127 transduced into Hep3BCas9 cells to generate a genome wide knockout pool. These gRNA transduced cells  
128 were then analyzed for their ability to be selected using GalNAc-*HPRT1* siRNA and 6TG. As illustrated in  
129 Figure 1d, cells were divided into four groups (0.6E+06 cells/group): 1) siRNA only, 2) siRNA with 6TG  
130 treatment, 3) 6TG only, and 4) negative control. To obtain sufficient but not excessive siRNA effect, 750  
131 nM (about IC60) GalNAc-*HPRT1* siRNA (8172) was used. On day 3 post-6TG treatment, the 6TG only group  
132 had 35% viable cells while the *HPRT1*-si + 6TG group had 52% viable cells (Figure 1d). On day 6 post-6TG  
133 treatment, the 6TG only group had only 5% viable cells while the *HPRT1*-si + 6TG group had 17% viable

134 cells (Figure 1d). These results indicate that GalNAc-*HPRT1* siRNA treatment was partially protective. This  
135 provides a screening phenotype well-suited for detecting gene knockouts that enhance RNAi activity.  
136 Based on our findings from this initial screen, we chose to use 6-day 100  $\mu$ M 6TG treatment as the  
137 condition for CRISPR screen. To test the impacts of siRNA dosage on CRISPR screen, the actual CRISPR  
138 screen was done with both 150 nM GalNAc-*HPRT1* siRNA (low dose group), and 750 nM GalNAc-*HPRT1*  
139 siRNA (high dose group). The CRISPR screen experimental scheme is diagramed in Figure 2a. The genomic  
140 DNA samples were extracted from all sample pellets collected during the screen and sent to Collecta for  
141 NGS (next gen sequencing) barcode sequencing.

#### 142 **NGS sequencing results**

143 The NGS sequencing results were analyzed by OGA algorithm<sup>27</sup>. False discovery rate (FDR) <0.2 was used  
144 as cutoff line. As shown in Supplementary Figure 3a-3b, all samples maintained good representation of  
145 gRNA library – roughly 77,000 gRNAs present with similar overall distribution. In addition, gRNAs that  
146 target *HPRT1* were successfully enriched by about 2-fold in 6TG treated vs. no 6TG group (Supplementary  
147 Figure 4). We then looked for additional genes that may play key roles in regulating GalNAc conjugated  
148 siRNA activity.

149 In order to identify genes that when knocked out can improve GalNAc conjugated siRNA internalization,  
150 trafficking or RNAi activity, we focused on gRNAs that were enriched in samples treated with both siRNA  
151 and 6TG but were not enriched in the 6TG treated only control group. These hits include genes that when  
152 knocked out could: 1) enhance GalNAc-*HPRT1* siRNA silencing potency, 2) increase sensitivity to 6TG in  
153 the absence of siRNA, or 3) enhance cell viability in the presence of 6TG. To select the genes with the most  
154 potent effects, we selected gene hits that were significantly (FDR<0.2) enriched in both high dose (750  
155 nM) and low dose (150 nM) GalNAc-*HPRT1* siRNA and 6TG treated groups. (Figure 2b). This analysis  
156 identified 17 genes (Figure 2b). To understand whether any of these 17 genes have impacts on cells'

157 sensitivity to 6TG treatment in the absence of siRNA, we plotted these genes with the genes depleted in  
158 no siRNA but only 6TG treated group vs. no siRNA and no 6TG treated samples (Figure 2c). In Figure 2c,  
159 the horizontal axis indicates the sensitivity to 6TG. The genes that when knocked out enhance the  
160 sensitivity to 6TG and lead to strong cell death upon 6TG treatment are enriched on the horizontal axis  
161 with smaller FDR. If  $FDR < 0.2$  was set as the cutoff, 8 genes were identified as promoting sensitivity to  
162 6TG treatment (Figure 2c). The genes that when knocked out have no impact on 6TG sensitivity have larger  
163 FDR on horizontal axis, and these genes (*RAB18*, *YAP1*, *CCNE1*, *SLC30A9*, *C14orf80*, *HIF1AN*, *TRAF2*, *NAPG*  
164 and *SCFD2*) are the most interesting to us because their enrichment is most likely to be directly related to  
165 siRNA delivery and activity.

#### 166 **Validation of primary CRISPR screen hits by secondary arrayed CRISPR screen**

167 As discussed above, the HPRT1-6TG selection CRISPR screen may introduce false positive hits. To  
168 overcome this, we used a multiplexed synthetic gRNA system developed by Synthego (Redwood City, CA),  
169 which provides efficient knockout of target genes and can be scaled up to screen in 96-well or 384-well  
170 format without clonal isolation. In this multi-guide strategy, three gRNAs designed in close proximity to  
171 one another are delivered together to Cas9+ cells to induce a large deletion in the target gene and more  
172 efficient target gene knockout than individual gRNA. After inhouse validation of this strategy  
173 (Supplementary Figure 5), we ordered multiplexed synthetic gRNAs for some of the CRISPR screen hits  
174 along with control genes to run secondary arrayed CRISPR validation.

175 As illustrated in Figure 2d, the multiplexed synthetic gRNAs for genes identified in our initial CRISPR screen  
176 (*RAB18*, *CCNE1*, *SLC30A9*, *NAPG*, *SCFD2*, *VPS37A*, *SAMD4B* and *CAB39*) along with some control genes  
177 (*AGO2*, *ASGR1*, and *ASGR2*) were transfected into Hep3BCas9 cells. CRISPR-KO cells generated in this  
178 manner were then treated with GalNAc-*HPRT1* siRNA or *HPRT1* siRNA delivered through other conjugation  
179 formats (anti-ASGR1 antibody conjugated *HPRT1* siRNA (6709) and cholesterol conjugated *HPRT1* siRNA



180 (17102), Supplementary Table 2). A heatmap of *HPRT1* siRNA silencing efficacy as measured by ddPCR  
181 (normalized to no siRNA control) is shown in Figure 2e. As expected, when *AGO2* is knocked out by  
182 multiplexed synthetic gRNA, the *HPRT1* siRNA silencing activity is abolished in all tested siRNA conjugates.  
183 Because *ASGR1* is a critical component of ASGPR receptor, *ASGR1* CRISPR-KO leads to loss of response to  
184 GalNAc-*HPRT1* siRNA as well as to anti-*ASGR1* antibody conjugated *HPRT1* siRNA. However, knocking out  
185 *ASGR1* had no impacts on the function of Cholesterol conjugated *HPRT1* siRNA. These results indicate that  
186 the multiplexed synthetic gRNA system was working as expected. Some CRISPR screen hits: *RAB18*, *SCFD2*,  
187 *NAPG*, and *SAMD48* when knocked out by multiplexed synthetic gRNA enhanced siRNA effects to different  
188 degrees (Figure 2e). *VPS37A* specifically enhanced cholesterol conjugated siRNA efficacy. Other screen  
189 hits, *CAB39*, *CCNE1* and *SLC30A9*, could not be validated by the multiplexed synthetic gRNA approach.  
190 Proteins encoded by *ZW10* and *STX18* had been shown to interact with RAB18 protein<sup>28,29</sup>. Knocking out  
191 *ZW10* and *STX18* by multiplexed synthetic gRNA also enhanced siRNA silencing efficacy (Figure 2e).

### 192 ***RAB18* knockdown/knockout enhances the silencing effects of multiple siRNA conjugates**

193 Since *RAB18* was the only RAB family member detected in our CRISPR screen, and because the RAB family  
194 is important in regulating intracellular vesicle trafficking, we decided to focus on understanding the  
195 mechanisms by which *RAB18* regulates siRNA activity in Hep3B. To study the function of *RAB18*, three  
196 *RAB18* specific siRNA molecules (siRAB18\_1, siRAB18\_2, and siRAB18\_3) (Supplementary Table 4)  
197 purchased from Ambion were validated for their silencing potency of *RAB18* in Hep3B cells through  
198 transfection study. Among three tested siRNA molecules, siRAB18\_3 which showed the best knocking  
199 down potency of *RAB18* (Figure 3a) was then used to study the function of *RAB18*. The Hep3B cells  
200 transfected with either siRAB18\_3 or a non-targeting control siRNA molecule (siNTC) for 24hr were further  
201 treated with GalNAc-*HPRT1* siRNA at various concentration. As illustrated in Figure 3b, the siRNA18\_3  
202 treated cells were able to maintain low level (23.2%) of *RAB18* mRNA measured by ddPCR on day 4 post

203 GalNAc-*HPRT1* siRNA treatment compared with siNTC treated cells. The level of *HPRT1* mRNA was also  
204 measured by ddPCR on day 4 post GalNAc-*HPRT1* siRNA treatment. As shown in Figure 3c, the knockdown  
205 of *HPRT1* was greater in siRAB18\_3 treated Hep3B cells compared to siNTC treated Hep3B cells. The IC50  
206 for siRAB18\_3 treated cells or siNTC treated cells was 24.8nM versus 223.6nM (Figure 3c), respectively, a  
207 10-fold change.

208 In order to completely abolish the function of *RAB18*, we created two *RAB18* knockout pools  
209 (RAB18\_KO\_1 and RAB18\_KO\_2) by transducing two lentiviral gRNA vectors targeting *RAB18* (SIGMA  
210 vector: U6-gRNA: PGK-puro-2A-tagBFP) into Hep3BCas9 cells (Supplementary Figure 6a). The *RAB18*  
211 knockout efficiency was verified by Amplicon-EZ sequencing (GENEWIZ, Newbury Park, CA)  
212 (Supplementary Figure 6b and 6c). Knocking out *RAB18* did not alter cell viability in Hep3BCas9 cells  
213 (supplementary Figure 6d). Since *RAB18* was identified through HPRT1-6TG selection screen, we first  
214 repeated the same assay in *RAB18* knockout cells. As shown in Figure 3d, compared with the parental  
215 Hep3BCas9 cells, when treated with GalNAc-*HPRT1* siRNA approximately 15% more *RAB18* knockout cells  
216 were able to survive under 6TG selection (58% in *RAB18* knockout cells compared to 43% in Hep3BCas9  
217 cells at the highest siRNA dose tested), indicating that *HPRT1* siRNA induced greater gene silencing in  
218 *RAB18* knockout cells than in Hep3BCas9 parental cells. Neither Hep3BCas9 cells nor *RAB18* knockout cells  
219 treated with GalNAc conjugated siRNA targeting *PPIB* gene (8714) as a non-relevant siRNA control showed  
220 enhanced resistance to 6TG treatment (Figure 3d, Supplementary Table 2). We then used ddPCR to  
221 directly measure the siRNA silencing potency in *RAB18* knockout cells. As illustrated in Figure 3e, 3c and  
222 3d, Hep3BCas9 cells and *RAB18* knockout cells were treated with three GalNAc conjugated siRNAs: *HPRT1*  
223 siRNA, *ASGR1* siRNA (16084) (Supplementary Table 2), and *PPIB* siRNA. For all three tested siRNAs, the  
224 target gene knockdown was greater in *RAB18* knockout cells compared to Hep3BCas9 parental cells  
225 (Figure 3e-g). The IC50 for *HPRT1* siRNA in Hep3BCas9 or two *RAB18* knockout lines was 83.4nM versus  
226 2.6nM or 4.1nM (Figure 3e), respectively, a 20~30-fold change. When tested using GalNAc-*ASGR1* siRNA,

227 the IC50 was 198.3nM in Hep3BCas9 cells and 7.9nM or 6.5nM in two *RAB18* knockout cells (Figure 3f).  
228 Compared to *HPRT1* and *ASGR1*, *PPIB* is a highly abundantly expressed gene in Hep3B cells (Figure 3g),  
229 that could not be silenced by GalNAc-*PPIB* siRNA in Hep3BCas9 cells (Figure 3g). However, the same *PPIB*  
230 siRNA was able to silence *PPIB* in two *RAB18* knockout pools (IC50=205.2nM or 391.8nM) (Figure 3g). The  
231 siRNA silencing efficacy at a later time point (11 days) was also checked (Supplementary Figure 7a-c).  
232 Although the silencing effect declined as the cells proliferated over time, the silencing potency was greater  
233 in *RAB18* knockout cells than in Hep3BCas9 cells. For example, when treated with GalNAc-*ASGR1*, the IC50  
234 at day 11 was 363.6nM in Hep3BCas9 cells and 41.3nM or 58.3nM in two *RAB18* knockout pools  
235 (Supplementary Figure 7a). These results lead us to conclude that *RAB18* knockout enhances the silencing  
236 potency of GalNAc conjugated siRNA as well as cholesterol and antibody conjugated siRNA.

#### 237 **Gene silencing induced by GalNAc conjugated siRNA in *RAB18* knockout cells requires *ASGR1***

238 As discussed and tested earlier, the GalNAc siRNA conjugate induced gene silencing is mediated through  
239 *ASGR1*. We therefore tested if *ASGR1* was required for GalNAc siRNA conjugates to function in *RAB18*  
240 knockout cells using an antibody blocking test (Figure 3h, Supplementary Figure 7d-e). As shown in Figure  
241 3h, the application of 7E11 was able to reduce the siRNA silencing efficacy of *HPRT1* gene in Hep3BCas9  
242 and *RAB18* knockout cells. Similar results were obtained when the same experiment performed by using  
243 *ASGR1* siRNA and *PPIB* siRNA to silence *ASGR1* and *PPIB* (Supplementary Figure 7d-e). Similarly to what  
244 we observed in Hep3B cells, the GalNAc siRNA conjugates rely on *ASGR1* to enter *RAB18* knockout cells.  
245 The two individually generated *RAB18* knockout pools behaved identically in all tests. Therefore, only one  
246 *RAB18* knockout pool was used for the rest of the related experiments (referred as *RAB18\_KO*).

#### 247 ***RAB18* knockout shows no effect on the activity of siRNA delivered through Lipofectamine transfection**

248 Lipofectamine reagents have been widely used experimentally as a safe and efficient method to deliver  
249 exogenous DNA and RNA into cells. After confirming that knocking out *RAB18* enhances siRNA potency  
250 delivered through GalNAc conjugates, we asked if knocking out *RAB18* could enhance siRNA potency  
251 delivered through Lipofectamine mediated transfection. To address this question, we used an  
252 unconjugated *HPRT1* siRNA (17629) (Supplementary Table 2) to treat the parental Hep3BCas9 and *RAB18*  
253 knockout cells at various concentrations with or without Lipofectamine RNAiMAX reagent (Invitrogen,  
254 Waltham, MA). As summarized in Figure 3i, Lipofectamine reagents efficiently silenced the target gene  
255 *HPRT1* at similar levels in both Hep3BCas9 (IC<sub>50</sub>=0.2nM) and *RAB18* knockout cells (IC<sub>50</sub>=0.3nM). This  
256 finding indicates that *RAB18* does not alter Lipofectamine mediated siRNA activity.

## 257 **DISCUSSION**

258 The HPRT1-6TG selection based CRISPR-Cas9 screen performed in Hep3B background has successfully  
259 identified several key regulators of GalNAc conjugated siRNA activity. Some of the hits from this screen,  
260 such as *RAB18*, *SCFD2*, *NAPG*, and *VPS37A*, have been validated through a secondary arrayed CRISPR  
261 screen system by using multiplexed synthetic gRNA. Here, we focused our efforts on studying the effects  
262 *RAB18* on siRNA activity.

263 Having confirmed that knocking out *RAB18* enhances siRNA silencing potency on multiple tested target  
264 genes (*HPRT1*, *ASGR1*, and *PP1B*) and through multiple siRNA conjugated formats (GalNAc, Cholesterol,  
265 and antibody conjugates), we attempted to elucidate the functional linkage between *RAB18* and siRNA  
266 activity. RAB GTPases constitute the largest family of small GTPases that have important roles in regulating  
267 membrane trafficking through switching between GTP-bound 'on' form and GDP-bound 'off' forms. There  
268 are more than 60 RAB family members in humans that are localized to distinct intracellular membranes  
269 and play important roles in regulating intracellular vesicle budding, uncoating, motility, and fusion. Once  
270 internalized, siRNA has been shown to traffic through the endocytic pathway<sup>30,31</sup>. We therefore expected

271 multiple members of the RAB family to be identified in our CRISPR screen as regulators of siRNA activity.

272 To our surprise, *RAB18* was the only RAB family member that came out of our screen (FDR<0.2).

273 As one of the 20 most highly conserved RAB GTPases present in the last eukaryotic common ancestor of  
274 both the plant and animal kingdoms<sup>32,33</sup>, *RAB18* has attracted great research interest and attention.

275 Studies conducted in the last couple decades have linked *RAB18* to regulation of lipid droplet (LD)  
276 formation<sup>28,34</sup>, inhibition of COPI independent retrograde trafficking from Golgi to endoplasmic reticulum

277 (ER)<sup>35</sup>, regulation of secretory granules<sup>36</sup> and peroxisomes<sup>37</sup>, promotion of hepatitis C virus (HCV)  
278 assembly on the LD membrane<sup>38</sup>, and regulation of normal ER structure<sup>39</sup>. Despite the intensive efforts on

279 studying *RAB18*, a defined molecular function of *RAB18* and its site of action has remained elusive. It is  
280 very difficult to tease out what known functions of *RAB18* gene might contribute to regulation of siRNA

281 activity, or whether a novel function of *RAB18* needs to be identified. However, several lines of evidence  
282 may provide a clue to a potential mechanism. First, the NRZ (NAG-RINT1-ZW10) tethering factors and their

283 associated ER-localized SNAREs (Use1, Syntaxin18, and BNIP1) form a complex with GTP-bound form of  
284 *RAB18* protein to mediate ER-LD contact formation<sup>28,29</sup>. Knocking out the genes *ZW10* and *STX18*

285 (encoding Syntaxin18) by multiplexed synthetic gRNA enhanced siRNA silencing efficacy (Figure 2e). This  
286 indicates that genes interacting with *RAB18* to regulate ER-LD tethering have the same function in

287 inhibiting siRNA silencing activity. Although it is still not clear how the ER-LD tethering impacts siRNA  
288 efficacy, this finding guided our attention to ER. We then asked, what is the connection between ER and

289 siRNA silencing? The siRNA mediated degradation of target mRNA has been shown to take place in the  
290 cytoplasm<sup>40</sup>. However, the subcellular sites of RNA silencing remain under debate. Intriguingly ER as a site

291 for protein translation mediated by ribosomes has been shown to be a central nucleation site of siRNA  
292 mediated RNA silencing<sup>41</sup>. In addition, an ER membrane resident protein CLIMP-63 has been proven to

293 interact with and stabilize Dicer<sup>42</sup>. As indicated in these studies, ER might serve as a subcellular silencing  
294 site for siRNA. After being internalized into endosomes, the siRNA inside endosomes could travel to ER

295 through retrograde transport. There are two different pathways of retrograde transport: the COPI-  
296 dependent and the COPI-independent pathways. Interestingly, *RAB18* loss of function mutants had been  
297 shown to specifically enhance COPI-independent retrograde Golgi-ER transport<sup>35</sup>. Although the exact  
298 molecular mechanism of *RAB18* regulation of siRNA activity has not yet been elucidated, the fact that  
299 knocking out genes functioning together with *RAB18* in regulating LD and ER tethering, such as *ZW10* and  
300 *STX18*, has similar impacts on siRNA silencing potency (Figure 2e) suggests that ER and retrograde  
301 transport related regulation might be worth more attention.

302 Despite the success of our HPRT1-6TG selection screen in identifying candidate regulators of siRNA  
303 potency, there were some limitations to this approach. First, the live/dead selection represents a very  
304 harsh cutoff for improving siRNA silencing potency. The idea behind HPRT-6TG selection is to use siRNA  
305 to knockdown *HPRT1* gene. Resistance to 6TG is associated with the extent of knockdown of *HPRT1*<sup>43</sup>. Our  
306 follow up study of *RAB18* has shown that by knocking out *RAB18*, the siRNA IC50 dose could be reduced  
307 by 20 to 30-fold (Figure 3e), indicating that *RAB18* is a strong regulator of siRNA activity. Nevertheless,  
308 when both Hep3BCas9 and *RAB18* knockout cells were challenged with HPRT1-6TG selection, the cell  
309 survival rate was only changed from 43% in Hep3BCas9 cells to 58% in *RAB18* knockout cells at the highest  
310 siRNA dosage tested (Figure 3d). This suggests that gene knockouts that improve survival by less than this  
311 amount may not be detected, even if they improve siRNA efficacy. Second, genes that regulate the  
312 sensitivity to 6TG could also be identified from the screen without having any function related to siRNA  
313 activity. These could include genes such as *HPRT1* itself as well as genes involved in the mismatch repair  
314 pathway<sup>26</sup>. Third, siRNA induced gene silencing is a complex process, in which multiple genes may be  
315 required to regulate individual steps. Therefore, one gRNA per cell strategy will miss the redundant genes.  
316 Finally, the screen described here is focused toward identifying genes that confer resistance but not genes  
317 that sensitize the siRNA activity. Knocking out genes that are normally required for siRNA activity would  
318 lead to resistance to siRNA activity and cause the cells to be depleted upon 6TG selection; consequently

319 their corresponding gRNAs would be depleted from NGS sequencing along with other gRNAs that cause  
320 cell death and would not be detected by our approach.

321 The described CRISPR screen was performed in Hep3B cells. Despite the great success of delivering siRNA  
322 to liver through conjugating to GalNAc, delivering siRNA into other tissues is still challenging. While it is  
323 still unclear whether the same siRNA trafficking route is utilized in other tissue or cell types, *RAB18* is a  
324 universally expressed gene across multiple tissue types and is highly conserved across species. It would  
325 therefore be interesting to see if *RAB18* knockout in other cell or tissue types can also enhance siRNA  
326 activity.

327 We report here the identification, using a pooled genome-wide CRISPR-Cas9 screen, of a single gene  
328 (*RAB18*) that, when knocked out, can enhance siRNA mediated gene silencing by at least 20-fold (IC50) in  
329 Hep3B cells. Given the current interest in utilizing siRNA as a therapeutic modality, identification of this  
330 key regulator may allow for the development of future pharmacological strategies to enhance siRNA  
331 efficacy.

## 332 **MATERIALS AND METHODS**

### 333 **Cell line and culture condition**

334 The Hep3B cells were purchased from ATCC (Manassas, VA). The culture condition for Hep3B cells is:  
335 EMEM (Eagle's Minimum Essential Medium from ATCC, Cat# 30-2003) + 10% FBS (Fetal Bovine Serum).  
336 The culture condition for Hep3Bcas9 cells is: EMEM + 10% FBS + 10 µg/mL Blasticidin. And the culture  
337 condition for *RAB18* knockout cells is: EMEM + 10% FBS + 10 µg/mL Blasticidin + 0.5 µg/mL Puromycin.

### 338 **Generate Hep3BCas9 cells and validate their editing function**

339 A TransEDIT CRISPR Cas9 nuclease expression lentivirus (pCLIP-Cas9-Nuclease-EFS-Blast) ordered from  
340 TransOMIC technologies (Huntsville, AL, Cat# NC0956087) was transduced at multiple MOI (0.5, 1, and 2)  
341 into Hep3B cells to generate Cas9 stable pools: Hep3BCas9\_0.5, Hep3BCas9\_1, and Hep3BCas9\_2,  
342 respectively. All cells were selected and maintained with 10 µg/mL Blasticidin after transduction. No  
343 toxicities were observed in all Cas9 stable expression Hep3B pools. Two gRNA lentivirus vectors targeting  
344 *SLC3A2* and *ASGR1* ordered from Milipore Sigma (Supplementary Table 3) were transduced individually  
345 into both parental Hep3B cell line and each of the Cas9 stable Hep3B pool. The *SLC3A2* and *ASGR1*  
346 expression levels before and after gRNA lentivirus transduction were measured through antibody staining  
347 followed by FLOW cytometry analysis. Compared to the parental Hep3B cell line, both target genes were  
348 successfully knocked out in all Cas9 stable Hep3B pools (Supplementary Figure 1), demonstrated the Cas9  
349 stable Hep3BCas9 cells were fully equipped with editing function. Since the editing effects were similar in  
350 all three Cas9 stable Hep3B pools, the one with lowest MOI (0.5, referred as Hep3BCas9 in the rest of this  
351 article) was chosen to perform the CRISPR screen to search for key regulators of GalNAc conjugated siRNA  
352 induced silencing to minimized potential Cas9 toxicity.

### 353 **HPRT1-6TG selection test**

354 To avoid both insufficient and over killing caused by 6TG, the feasibility of using HPRT1-6TG live/dead  
355 selection for CRISPR screen was tested in a small-scale pilot run using 100 µM 6TG (a dose close to IC70,  
356 Figure 1d) and 20 µM 6TG (a dose close to IC50, Supplementary Figure 2). The cells were first equally  
357 divided into four groups (0.6E+06 cells/group): 1) siRNA only, 2) siRNA with 6TG treatment, 3) 6TG only,  
358 and 4) negative control. To obtain sufficient but not excessive siRNA effect, a 750nM (about IC60) GalNAc-  
359 *HPRT1* siRNA (8172) was added to group 1 and 2 on day 0 of experiment. On day 3 of experiment, the  
360 tissue culture media was removed from each group and then 100 µM 6TG (or 20 µM 6TG) was added to  
361 group 2 and 3, while non-selection full growth media was added to group 1 and 4. The cells were incubated



362 for 3 days after 6TG treatment. Then cells were then split and the 6TG media was replaced with full growth  
363 media without 6TG and cultured for additional 3 days. The cell count readings (measured by ViCell) were  
364 recorded on day 3 post-6TG treatment and day 6 post-6TG treatment and plotted in Figure 1d and  
365 Supplementary Figure 2.

### 366 **Large scale pooled genome wide CRISPR screen**

367 An 80k genome wide CRISPR gRNA lentivirus library (CRISPR KOHW 80K (lot# 17050301)) was purchased  
368 from Collecta (Mountain View, CA) to generate a gene knockout pool. The CRISPR KOHW 80K library is  
369 constructed in Collecta's pRSG16-U6-sg-UbiC-TagRFP-2A-Puro lentiviral vector that expresses gRNA under  
370 a wild-type U6 promoter and TagRFP and Puro resistance genes under a human ubiquitin C promoter. This  
371 library covers approximately 19,000 genes with 4 gRNA for each gene. The procedure of large scale CRISPR  
372 screen is illustrated in Figure 2a. Briefly, the gRNA lentivirus library was transduced into  $9.2E+07$   
373 Hep3BCas9 cells. The actual library transduction efficiency as reflected by RFP positive cell population  
374 (61%) was checked through flow cytometry analysis on day 4 post-transduction. Based on calculation, the  
375 actual gRNA lentivirus library transduction MOI was about 0.9, and the actual coverage was 1035. The  
376 transduced cells were then selected with puromycin and blasticidin for 14 days. On day 14 post-selection,  
377 87% of the cells were RFP positive (indicating 87% of the cells had an integrated gRNA) by flow cytometry.  
378 On day 14 post-selection,  $1E+08$  cells were collected and frozen as baseline sample. The rest of cells were  
379 equally divided into three groups ( $2.4E+08$  cells/group): group 1 was treated with 150 nM GalNAc-*HPRT1*  
380 siRNA as low dose group, group 2 was treated with 750 nM GalNAc-*HPRT1* siRNA as high dose group, and  
381 group 3 was set as no siRNA control. On day 3 post-siRNA treatment,  $2E+08$  cells were collected and frozen  
382 from each group as before 6TG treatment samples, then the rest of the cells in each group were further  
383 divided into two subgroups: a) no 6TG group and b) 6TG group. The cell culture medium with siRNA was  
384 removed from each flask and fresh medium containing 100  $\mu$ M 6TG was added into each flask of 6TG

385 groups and fresh medium without 6TG was added to each flask in no 6TG groups. All cells were incubated  
386 for another 3 days then all cells were split into fresh medium without 6TG. After a final 3-day incubation,  
387 all cells were harvested. The genomic DNA samples were extracted from all samples collected by using  
388 Genra Puregene Cell Kit (QIAGEN INC, Cat# 158767) following the user manual and sent to Collecta for  
389 NGS barcode sequencing.

### 390 **Secondary arrayed CRISPR screen**

391 The multiplexed synthesized gRNA of each target gene for secondary arrayed CRISPR screen was designed  
392 and synthesized by Synthego Corporation (Palo Alto, CA). All gRNAs were transfected into Hep3BCas9  
393 stable cells at 96-well plate format using Lipofectamine CRISPRMAX Cas9 Transfection Reagent  
394 (Invitrogen, Cat# CMAX00008). 1.5  $\mu$ L of 0.3  $\mu$ M multiplexed synthesized gRNA was first mixed with 8.5  
395  $\mu$ L Opti-MEM medium in each well. 0.2  $\mu$ L of CRISPRMAX reagent diluted in 5  $\mu$ L of Opti-MEM medium  
396 was then added to each well and incubated at room temperature for 5 to 10 minutes. After incubation,  
397 85  $\mu$ L (15,000 cells per well) of Hep3BCas9 stable cells were added to each well. The plate was allowed to  
398 sit for 20 minutes prior to placing it in 37°C tissue culture incubator, and transfection medium was  
399 replaced with EMEM containing 10% FBS and 1% AA (Antibiotic Antimycotic Solution) at ~6 hours after  
400 transfection. The cells were split at 1:6 ratio on day 3 post-incubation. The cells were incubated for a total  
401 of 6 days after CRISPRMAX transfection to allow protein knockdown. On day 6 post-transfection, *HPRT1*  
402 siRNA conjugated to different delivery vehicles (GalNAc, Cholesterol, Anti-ASGR1 antibody) was added to  
403 each well at the desired concentrations (500 nM, 100 nM and 20 nM) followed by 4-day incubation period  
404 in 37°C tissue culture incubator. The total RNA of each sample was extracted by using KingFisher Flex  
405 System (Thermo Fisher Scientific) and MagMAX mirVana Total RNA Isolation Kit (Applied Biosystems, Cat#  
406 A27828) as per manufacturer instructions. The cDNA was then synthesized from total RNA sample using

407 the Applied Biosystems High Capacity Reverse Transcription Kit (Cat# 4368813), and used to quantify  
408 siRNA activity by ddPCR (Droplet Digital Polymerase Chain Reaction).

#### 409 **Droplet Digital Polymerase Chain Reaction (ddPCR)**

410 The ddPCR reactions were assembled using BioRad's ddPCR Supermix for Probes (Cat# 1863010) as per  
411 the user manual. Droplets were then generated by QX200 Automated Droplet Generator (BioRad, Cat#  
412 1864101). Thermal cycling reactions were then performed on C1000 Touch Thermal Cycler with 96-Deep  
413 Well Reaction Module (BioRad, Cat# 1851197) (BioRad, Cat# 1851197). The reactions were then read by  
414 QX200 Droplet Reader (BioRad, Cat# 1864003) and analyzed by using BioRad's QuantaSoft software  
415 package. The predesigned primer/probe for ddPCR assays were obtained from Integrated DNA  
416 Technologies (Coralville, IA) with 3.6:1 primer to probe ratio. The assay ID of primer/probe used for  
417 quantifying *HPRT1* gene is: Hs.PT.39a.22214821. The assay ID of primer/probe used for quantifying *ASGR1*  
418 gene is: Hs.PT.56a.24725395. The assay ID of primer/probe used for quantifying *PPIB* gene is:  
419 Hs.PT.58.40006718. The assay ID of primer/probe used for quantifying housekeeping gene *TBP* is:  
420 Hs.PT.58.19489510. The ddPCR copy number readings (copies/20  $\mu$ L) of both target gene (*HPRT1*, *ASGR1*  
421 or *PPIB*) and housekeeping gene *TBP* were recorded for each well. The normalized target gene mRNA level  
422 was calculated by dividing the ddPCR reading of the target gene by the ddPCR reading of *TBP* taken from  
423 the same well. The resulting number of siRNA treated sample was further divided by the number of no  
424 siRNA treatment sample to obtain the percentage reading of the target gene mRNA level, which was  
425 plotted in Figure 1b, Figure 3e~i, and Figure 4.

#### 426 **siRAB18 and siNTC transfection**

427 The siRNA molecules targeting *RAB18* gene, siRAB18\_1 (Ambion Silencer Select cat# 4390824 ID# s22703),  
428 siRAB18\_2 (ID# s22704), and siRAB18\_3 (ID# s22705) were purchased from Ambion (Ambion, Austin, TX).

429 The non-targeting negative control siRNA (siNTC, cat# 4390843) were purchased from Invitrogen. The  
430 sequence details of siRNA targeting *RAB18* were described in Supplementary Table 4. To test siRAB18  
431 efficacy, several concentrations of each siRAB18 molecule (0.24nM to 50nM) or sterile water (negative  
432 control) was individually reverse transfected in duplicate into Hep3B cells using lipofectamine RNAiMAX  
433 (Invitrogen, cat#13778075). 24 hours post-transfection, cells were lysed and harvested for RNA using  
434 MagMAX mirVana Total RNA Isolation kit (Applied Biosystems, Cat# A27828) and reverse transcribed for  
435 ddPCR analysis using the Applied Biosystems High Capacity Reverse Transcription Kit (Cat# 4368813),  
436 according to manufacturer instructions. For analysis of the effect of *RAB18* knockdown on GalNAc-*HPRT1*  
437 siRNA efficacy, siNTC (50nM) or siRAB18-3 (50nM) was reverse transfected into Hep3B cells. 24 hours  
438 post-transfection, cells were trypsinized and washed twice in EMEM to remove residual transfection  
439 reagent, then plated into 96-well plates containing either PBS or multiple concentrations of GalNAc-*HPRT1*  
440 siRNA. On day 4 post GalNAc-*HPRT1* siRNA treatment, the cells were lysed for RNA isolation and cDNA  
441 synthesis as described above.

#### 442 **Anti-ASGR1 antibody blocking test**

443 The Hep3BCas9 cells and *RAB18* knockout cells were first pre-incubated with in-house generated anti-  
444 ASGR1 antibody (7E11), isotype control antibody, or no antibody for half an hour, followed by adding  
445 GalNAc-*HPRT1* siRNA treatment at different doses. The final antibody concentration was 50 µg/mL and  
446 2,000 cells were seeded each well. After incubating in 37°C tissue culture incubator for 4 days, the target  
447 gene (*HPRT1*) mRNA levels were measured using ddPCR analysis.

#### 448 **ACKNOWLEDGEMENTS**

449 We thank Stephen Wong and Oliver Homann for providing input for NGS data analysis. We also thank  
450 Karen Siegler for providing 7E11 antibody.

451 **AUTHOR CONTRIBUTIONS**

452 Michael Ollmann, Jiamiao Lu, Patrick Collins, Chi-Ming Li, and Songli Wang conceived and designed the  
453 study. Jiamiao Lu carried out the pooled genome wide CRISPR screen, ddPCR analysis, *RAB18* knockout  
454 study and drafted the manuscript. Elissa Swearingen carried out initial siRNA efficacy test and 6TG  
455 sensitivity test in Hep3B cells. Miki Hardy conducted the secondary arrayed CRISPR screen. Patrick Collins  
456 performed the statistical analysis of NGS results. Bin Wu conjugated siRNA molecules tested in this study.  
457 Eric Yuan performed *RAB18* knockdown study. Daniel Lu carried out Amplicon\_Seq analysis to assess the  
458 editing efficacy of arrayed CRISPR platform. All authors contributed to manuscript revisions. All authors  
459 approved the final version of the manuscript and agree to be held at countable for the content therein.

460 **CONFLICTS OF INTEREST:**

461 All authors have the following conflicts of interest to declare: Jiamiao Lu, Elissa Swearingen, Bin Wu, Eric  
462 Yuan, Daniel Lu, Chi-Ming Li, and Songli Wang are employees at Amgen Inc. Michael Ollmann, Patrick  
463 Collins, and Miki Hardy were employed by Amgen Inc. while working on the study. All authors owned  
464 Amgen shares when the study was carried out. However, these do not alter the authors' adherence to all  
465 journal policies on sharing data and materials. None of the authors serves as a current Editorial Team  
466 member for this journal.

467 **KEYWORDS:**

468 *RAB18*; GalNAc conjugated siRNA; siRNA silencing efficacy; siRNA delivery; pooled genome wide knockout  
469 screen

470

471 REFERENCES

- 472 1 Chu, C. Y. & Rana, T. M. Small RNAs: regulators and guardians of the genome. *J Cell Physiol* **213**,  
473 412-419, doi:10.1002/jcp.21230 (2007).
- 474 2 Dowdy, S. F. Overcoming cellular barriers for RNA therapeutics. *Nat Biotechnol* **35**, 222-229,  
475 doi:10.1038/nbt.3802 (2017).
- 476 3 Juliano, R. L. The delivery of therapeutic oligonucleotides. *Nucleic Acids Res* **44**, 6518-6548,  
477 doi:10.1093/nar/gkw236 (2016).
- 478 4 Khvorova, A. & Watts, J. K. The chemical evolution of oligonucleotide therapies of clinical utility.  
479 *Nat Biotechnol* **35**, 238-248, doi:10.1038/nbt.3765 (2017).
- 480 5 Nair, J. K., Attarwala, H., Sehgal, A., Wang, Q., Aluri, K., Zhang, X., Gao, M., Liu, J., Indrakanti, R.,  
481 Schofield, S., *et al.* Impact of enhanced metabolic stability on pharmacokinetics and  
482 pharmacodynamics of GalNAc-siRNA conjugates. *Nucleic Acids Res* **45**, 10969-10977,  
483 doi:10.1093/nar/gkx818 (2017).
- 484 6 Nair, J. K., Willoughby, J. L., Chan, A., Charisse, K., Alam, M. R., Qang, Q., Hoekstra, M., Kandasamy,  
485 P., Kel'in, A. V., Milstein, S. *et al.* Multivalent N-acetylgalactosamine-conjugated siRNA localizes in  
486 hepatocytes and elicits robust RNAi-mediated gene silencing. *J Am Chem Soc* **136**, 16958-16961,  
487 doi:10.1021/ja505986a (2014).
- 488 7 Chan, A., Liebow, A., Yasuda, M., Gan, L., Racie, T., Maier, M., Kuchimanchi, S., Foster, D., Milstein,  
489 S., Charisse, K. *et al.* Preclinical Development of a Subcutaneous ALAS1 RNAi Therapeutic for  
490 Treatment of Hepatic Porphyrias Using Circulating RNA Quantification. *Mol Ther Nucleic Acids* **4**,  
491 e263, doi:10.1038/mtna.2015.36 (2015).
- 492 8 Pasi, K. J., Rangarajan, S., Georgiev, P., Mant, T., Creagh, M. D., Lissitchkov, T., Bevan, D., Austin,  
493 S., Hay, C. R., Hegemann, I. *et al.* Targeting of Antithrombin in Hemophilia A or B with RNAi  
494 Therapy. *N Engl J Med* **377**, 819-828, doi:10.1056/NEJMoa1616569 (2017).
- 495 9 Baenziger, J. U. & Fiete, D. Galactose and N-acetylgalactosamine-specific endocytosis of  
496 glycopeptides by isolated rat hepatocytes. *Cell* **22**, 611-620, doi:10.1016/0092-8674(80)90371-2  
497 (1980).
- 498 10 Meier, M., Bider, M. D., Malashkevich, V. N., Spiess, M. & Burkhard, P. Crystal structure of the  
499 carbohydrate recognition domain of the H1 subunit of the asialoglycoprotein receptor. *J Mol Biol*  
500 **300**, 857-865, doi:10.1006/jmbi.2000.3853 (2000).
- 501 11 Pricer, W. E., Jr. & Ashwell, G. The binding of desialylated glycoproteins by plasma membranes of  
502 rat liver. *J Biol Chem* **246**, 4825-4833 (1971).
- 503 12 Spiess, M. & Lodish, H. F. An internal signal sequence: the asialoglycoprotein receptor membrane  
504 anchor. *Cell* **44**, 177-185, doi:10.1016/0092-8674(86)90496-4 (1986).
- 505 13 Braun, J. R., Willnow, T. E., Ishibashi, S., Ashwell, G. & Herz, J. The major subunit of the  
506 asialoglycoprotein receptor is expressed on the hepatocellular surface in mice lacking the minor  
507 receptor subunit. *J Biol Chem* **271**, 21160-21166, doi:10.1074/jbc.271.35.21160 (1996).
- 508 14 Drickamer, K., Mamon, J. F., Binns, G. & Leung, J. O. Primary structure of the rat liver  
509 asialoglycoprotein receptor. Structural evidence for multiple polypeptide species. *J Biol Chem* **259**,  
510 770-778 (1984).
- 511 15 Prakash, T. P., Graham, M. J., Yu, J., Carty, R., Low, A., Chappell, A., Schmidt, K., Zhao, C., Aghajan,  
512 M., Murray, H. F. *et al.* Targeted delivery of antisense oligonucleotides to hepatocytes using  
513 triantennary N-acetyl galactosamine improves potency 10-fold in mice. *Nucleic Acids Res* **42**,  
514 8796-8807, doi:10.1093/nar/gku531 (2014).
- 515 16 Gilleron, J., Querbes, W., Zeigerer, A., Borodovsky, A., Marsico, G., Schubert, U., Manygoats, K.,  
516 Seifert, S., Andree, C., Stoter, M. *et al.* Image-based analysis of lipid nanoparticle-mediated siRNA

- 517 delivery, intracellular trafficking and endosomal escape. *Nat Biotechnol* **31**, 638-646,  
518 doi:10.1038/nbt.2612 (2013).
- 519 17 Leuschner, P. J., Ameres, S. L., Kueng, S. & Martinez, J. Cleavage of the siRNA passenger strand  
520 during RISC assembly in human cells. *EMBO Rep* **7**, 314-320, doi:10.1038/sj.embor.7400637  
521 (2006).
- 522 18 Nakanishi, K. Anatomy of RISC: how do small RNAs and chaperones activate Argonaute proteins?  
523 *Wiley Interdiscip Rev RNA* **7**, 637-660, doi:10.1002/wrna.1356 (2016).
- 524 19 Springer, A. D. & Dowdy, S. F. GalNAc-siRNA Conjugates: Leading the Way for Delivery of RNAi  
525 Therapeutics. *Nucleic Acid Ther* **28**, 109-118, doi:10.1089/nat.2018.0736 (2018).
- 526 20 Cho, S. W., Kim, S., Kim, J. M. & Kim, J. S. Targeted genome engineering in human cells with the  
527 Cas9 RNA-guided endonuclease. *Nat Biotechnol* **31**, 230-232, doi:10.1038/nbt.2507 (2013).
- 528 21 Cong, L., Ran, F. A., Cox, D., Lin, S., Barretto, R., Habib, N., Hsu, P. D., Wu, X., Jiang, W., Marraffini,  
529 L. A. *et al.* Multiplex genome engineering using CRISPR/Cas systems. *Science* **339**, 819-823,  
530 doi:10.1126/science.1231143 (2013).
- 531 22 Jinek, M., Chylinski, K., Fonfara, I., Hauer, M., Doudna, J. A., Charpentier, E. A programmable dual-  
532 RNA-guided DNA endonuclease in adaptive bacterial immunity. *Science* **337**, 816-821,  
533 doi:10.1126/science.1225829 (2012).
- 534 23 Wang, T., Wei, J. J., Sabatini, D. M. & Lander, E. S. Genetic screens in human cells using the CRISPR-  
535 Cas9 system. *Science* **343**, 80-84, doi:10.1126/science.1246981 (2014).
- 536 24 Shalem, O., Sanjana, N. E., Hartenian, E., Shi, X., Scott, D. A., Mikkelsen, T., Heckl, D., Ebert, B. L.,  
537 Root, D. E., Doench, J. G. *et al.* Genome-scale CRISPR-Cas9 knockout screening in human cells.  
538 *Science* **343**, 84-87, doi:10.1126/science.1247005 (2014).
- 539 25 Liao, S., Tammara, M. & Yan, H. Enriching CRISPR-Cas9 targeted cells by co-targeting the HPRT  
540 gene. *Nucleic Acids Res* **43**, e134, doi:10.1093/nar/gkv675 (2015).
- 541 26 Glaab, W. E., Risinger, J. I., Umar, A., barrett, J. C., Kunkel, T. A., Tindall, K. R. Resistance to 6-  
542 thioguanine in mismatch repair-deficient human cancer cell lines correlates with an increase in  
543 induced mutations at the HPRT locus. *Carcinogenesis* **19**, 1931-1937,  
544 doi:10.1093/carcin/19.11.1931 (1998).
- 545 27 Meisen, W. H., Nejad, Z. B., Hardy, M., Zhao, H., Oliverio, O., Wang, S., Hale, C., Ollmann, M. M.,  
546 Collins, P. J. Pooled Screens Identify GPR108 and TM9SF2 as Host Cell Factors Critical for AAV  
547 Transduction. *Mol Ther Methods Clin Dev* **17**, 601-611, doi:10.1016/j.omtm.2020.03.012 (2020).
- 548 28 Xu, D., Li, Y., Wu, L., Li, Y., Zhao, D., Yu, J., Huang, T., Ferguson, C., Parton, R. G., Yang, H. *et al.*  
549 Rab18 promotes lipid droplet (LD) growth by tethering the ER to LDs through SNARE and NRZ  
550 interactions. *J Cell Biol* **217**, 975-995, doi:10.1083/jcb.201704184 (2018).
- 551 29 Li, D., Zhao, Y. G., Li, D., Zhao, H., Huang, J., Miao, G., Feng, D., Liu, P., Li, D., Zhang, H. The ER-  
552 Localized Protein DFCP1 Modulates ER-Lipid Droplet Contact Formation. *Cell Rep* **27**, 343-358  
553 e345, doi:10.1016/j.celrep.2019.03.025 (2019).
- 554 30 Pereira-Leal, J. B. & Seabra, M. C. Evolution of the Rab family of small GTP-binding proteins. *J Mol*  
555 *Biol* **313**, 889-901, doi:10.1006/jmbi.2001.5072 (2001).
- 556 31 Stenmark, H. & Olkkonen, V. M. The Rab GTPase family. *Genome Biol* **2**, REVIEWS3007,  
557 doi:10.1186/gb-2001-2-5-reviews3007 (2001).
- 558 32 Elias, M., Brighouse, A., Gabernet-Castello, C., Field, M. C. & Dacks, J. B. Sculpting the  
559 endomembrane system in deep time: high resolution phylogenetics of Rab GTPases. *J Cell Sci* **125**,  
560 2500-2508, doi:10.1242/jcs.101378 (2012).
- 561 33 Klopper, T. H., Kienle, N., Fasshauer, D. & Munro, S. Untangling the evolution of Rab G proteins:  
562 implications of a comprehensive genomic analysis. *BMC Biol* **10**, 71, doi:10.1186/1741-7007-10-  
563 71 (2012).

- 564 34 Martin, S., Driessen, K., Nixon, S. J., Zerial, M. & Parton, R. G. Regulated localization of Rab18 to  
565 lipid droplets: effects of lipolytic stimulation and inhibition of lipid droplet catabolism. *J Biol Chem*  
566 **280**, 42325-42335, doi:10.1074/jbc.M506651200 (2005).
- 567 35 Dejgaard, S. Y., Murshid, A., Erman, A., Kizilay, O., Verbich, D., Lodge, R., Dejgaard, K., Ly-Hartig,  
568 T. B., Pepperkok, R., Simpson, J. C. *et al.* Rab18 and Rab43 have key roles in ER-Golgi trafficking. *J*  
569 *Cell Sci* **121**, 2768-2781, doi:10.1242/jcs.021808 (2008).
- 570 36 Vazquez-Martinez, R., Cruz-Garcia, D., Duran-Prado, M., Peinado, J. R., Castano, J. P., Malagon, M.  
571 M. Rab18 inhibits secretory activity in neuroendocrine cells by interacting with secretory granules.  
572 *Traffic* **8**, 867-882, doi:10.1111/j.1600-0854.2007.00570.x (2007).
- 573 37 Gronemeyer, T., Wiese, S., Grinhagens, S., Schollenberger, L., Satyagraha, A., Huber, L. A., Meyer,  
574 H. E., Warscheid, B., Just, W. W. Localization of Rab proteins to peroxisomes: a proteomics and  
575 immunofluorescence study. *FEBS Lett* **587**, 328-338, doi:10.1016/j.febslet.2012.12.025 (2013).
- 576 38 Salloum, S., Wang, H., Ferguson, C., Parton, R. G. & Tai, A. W. Rab18 binds to hepatitis C virus  
577 NS5A and promotes interaction between sites of viral replication and lipid droplets. *PLoS Pathog*  
578 **9**, e1003513, doi:10.1371/journal.ppat.1003513 (2013).
- 579 39 Gerondopoulos, A., Bastos, R. N., Yoshimura, S., Anderson, R., Carpanini, S., Aligianis, I., Handley,  
580 M. T., Barr, F. A. Rab18 and a Rab18 GEF complex are required for normal ER structure. *J Cell Biol*  
581 **205**, 707-720, doi:10.1083/jcb.201403026 (2014).
- 582 40 Zeng, Y. & Cullen, B. R. RNA interference in human cells is restricted to the cytoplasm. *RNA* **8**, 855-  
583 860, doi:10.1017/s1355838202020071 (2002).
- 584 41 Stalder, L., Heusermann, W., Sokol, L., Trojer, D., Wirz, J., Hean, J., Fritzsche, A., Aeschmann, F.,  
585 Pfanzagl, V., Basselet P. *et al.* The rough endoplasmic reticulum is a central nucleation site of  
586 siRNA-mediated RNA silencing. *EMBO J* **32**, 1115-1127, doi:10.1038/emboj.2013.52 (2013).
- 587 42 Pepin, G., Perron, M. P. & Provost, P. Regulation of human Dicer by the resident ER membrane  
588 protein CLIMP-63. *Nucleic Acids Res* **40**, 11603-11617, doi:10.1093/nar/gks903 (2012).
- 589 43 Choudhary, R., Baturin, D., Fosmire, S., Freed, B. & Porter, C. C. Knockdown of HPRT for selection  
590 of genetically modified human hematopoietic progenitor cells. *PLoS One* **8**, e59594,  
591 doi:10.1371/journal.pone.0059594 (2013).

592

## 593 **FIGURE LEGENDS**

594 Figure 1. Validation of screen conditions for pooled genome wide CRISPR-Cas9 screen. a) Comparison of  
595 target gene (*ASGR1*) silencing potency in human primary hepatocytes, Hep3B and HepG2 cells by two  
596 GalNAc conjugated *ASGR1* siRNAs. The features of these two siRNA conjugates are described in  
597 Supplementary Table 2. b) Treatment with an in-house made anti-*ASGR1* antibody, 7E11, mitigated the  
598 *HPRT1* gene silencing induced by GalNAc-*HPRT1* siRNA (8172) in Hep3B cells. Left panel outlines the  
599 experiment scheme and the right panel shows the ddPCR measurement of *HPRT1* mRNA levels in  
600 percentage normalized by housekeeping gene *TBP* readings and no siRNA (PBS only) treated control



601 group. The feature and sequence of siRNA 8172 is described in Supplementary Table 2. c) Dosage  
602 dependent kill curve of 6TG treatment in Hep3BCas9 cells. d) A small-scale pilot experiment to validate  
603 the feasibility of using HPRT1-6TG live/dead selection for CRISPR screen. The gRNA lentivirus library  
604 transduced Hep3BCas9 cells were treated with GalNAc-*HPRT1* siRNA and/or 6TG (100  $\mu$ L) in different  
605 groups. The viable cell count measured by ViCell on day 3 and day 6 post-6TG treatment for each  
606 treatment group was normalized by negative control group readings. The resulting normalized viability  
607 percentage of each group at both time points was plotted into bar graph. Left panel: Day 3 post-6TG  
608 treatment data. Right panel: Day 6 post-6TG treatment data.

609 Figure 2. Large-scale pooled genome wide CRISPR knockout screen experiment and candidate gene  
610 validation. a) Experiment scheme of large-scale pooled genome wide CRISPR knockout screen. b) Analysis  
611 of the CRISPR screen results by overlapping enriched genes in both 150 nM siRNA + 6TG treated samples  
612 (150si6TGd9) vs. no siRNA but 6TG treated samples (nosi6TGd9) and 750 nM siRNA + 6TG treated samples  
613 (750si6TGd9) vs. no siRNA but 6TG treated samples (nosi6TGd9). A total of 17 genes were identified with  
614 FDR<0.2 (outlined by dashed line). c) Analysis of the CRISPR screen results by overlapping enriched genes  
615 from 750 nM siRNA + 6TG treated samples (750si6TGd9) vs. no siRNA but 6TG treated samples  
616 (nosi6TGd9) with depleted genes in 6TG only vs no siRNA no 6TG samples. The horizontal axis indicates  
617 the sensitivity to 6TG. The dashed line outlines 8 genes with FDR<0.2 that were heavily depleted upon  
618 6TG treatment. d) Experiment scheme for testing of regulators of *HPRT1*-siRNA activity using secondary  
619 arrayed multiplexed synthetic gRNA screening in 96-well format. e) Heatmap results of secondary arrayed  
620 multiplexed synthetic gRNA shown in c). In the heatmap, red indicates reduced *HPRT1* siRNA silencing  
621 activity and green indicates enhanced *HPRT1* siRNA silencing activity. Colors indicate the percentage of  
622 *HPRT1/TBP* mRNA signals detected through ddPCR and normalized to no siRNA control. (*TBP*: a  
623 housekeeping gene)

624 Figure 3. Validation of the effect of *RAB18* knockdown and knockout on siRNA silencing potency. a) The  
625 knocking down efficacy of three siRNA molecules targeting *RAB18* in Hep3B cells. The RNA samples were  
626 extracted from Hep3B cells treated with three different siRNA molecules targeting *RAB18* gene at various  
627 concentrations at 24hr post treatment. The cDNA samples synthesized from RNA through reverse  
628 transcription were then used to perform ddPCR. The *RAB18* ddPCR readings normalized by housekeeping  
629 gene *TBP* were used to calculate the percentage of *RAB18* mRNA level for this plot. b) The *RAB18* mRNA  
630 level measured by ddPCR on day 4 post GalNAc-*HPRT1* siRNA treatment. The Hep3B cells were pretreated  
631 with siRAB18\_3 or siNTC molecules through transfection. 24hr later, after washing off the transfection  
632 media, the cells were treated with GalNAc-*HPRT1* siRNA at various concentrations. On day 4 post GalNAc-  
633 *HPRT1* siRNA treatment, the cells were harvested for ddPCR measurement of *RAB18* mRNA level. c)  
634 Measurement of GalNAc-*HPRT1* siRNA silencing potency in both siRAB18\_3 and siNTC treated Hep3B cells  
635 by ddPCR on day 4 post- GalNAc-*HPRT1* siRNA treatment. The cells harvested from experiment described  
636 in “b” were also measured for *HPRT1* level through ddPCR. Plotted here are *HPRT1* mRNA levels in  
637 percentage normalized by housekeeping gene *TBP* readings and no siRNA (PBS only) treated control  
638 group. d) *HPRT1*-6TG live/dead selection performed in both Hep3BCas9 parental cells and *RAB18*  
639 knockout cells. Left panel outlines the experiment scheme and the right panel shows the cell lysis rate  
640 measured with CellTiter-Glo reagents (Promega, Madison, WI). e) Measurement of GalNAc-*HPRT1* siRNA  
641 silencing potency in both Hep3BCas9 and *RAB18* knockout cells by ddPCR on day 4 post-siRNA treatment.  
642 Left panel summarizes the experiment scheme and the right panel shows the *HPRT1* mRNA levels in  
643 percentage normalized to housekeeping gene *TBP* readings and no siRNA (PBS only) treated control group.  
644 *PPIB* siRNA was used as control siRNA. f) Measurement of GalNAc-*ASGR1* siRNA silencing potency in both  
645 Hep3BCas9 and *RAB18* knockout cells by ddPCR on day 4 post-siRNA treatment. The experiment scheme  
646 is the same as shown in “e”. Plotted here are *ASGR1* mRNA levels in percentage normalized by  
647 housekeeping gene *TBP* readings and no siRNA (PBS only) treated control group. *PPIB* siRNA was used as

648 control siRNA. g) The same experiment shown in “e” was performed using GalNAc-*PP1B* siRNA. Left panel  
649 lists the normal target genes’ expression profile in FPKM (Fragments Per Kilobase of transcript per Million  
650 mapped reads) (obtained from Broad Institute Cancer Cell Line Encyclopedia (CCLE)). Right panel plots the  
651 *PP1B* mRNA levels in percentage normalized by housekeeping gene *TBP* readings and no siRNA (PBS only)  
652 treated control group. *HPRT1* siRNA was used as control siRNA. h) Antibody blocking test in Hep3BCas9  
653 and *RAB18* knockout cells by using anti-ASGR1 antibody, 7E11. Left panel summarizes the experiment  
654 scheme and the right panel shows the ddPCR measurement of *HPRT1* mRNA levels in percentage  
655 normalized by housekeeping gene *TBP* readings and no siRNA (PBS only) treated control group. i)  
656 Unconjugated *HPRT1* siRNA transfection assay in Hep3BCas9 and *RAB18* knockout cells. The unconjugated  
657 *HPRT1* siRNA (17629) was delivered into Hep3BCas9 and *RAB18* knockout cells through either conjugating  
658 to GalNAc or Lipofectamine reagent (RNAiMAX) mediated transfection. The *HPRT1* mRNA levels were  
659 measured by ddPCR on day 4 after siRNA treatment. Plotted is the *HPRT1* mRNA levels in percentage  
660 normalized by housekeeping gene *TBP* readings and no siRNA (PBS only) treated control group. The  
661 features of siRNA 17629 is described in Supplementary Table 2.

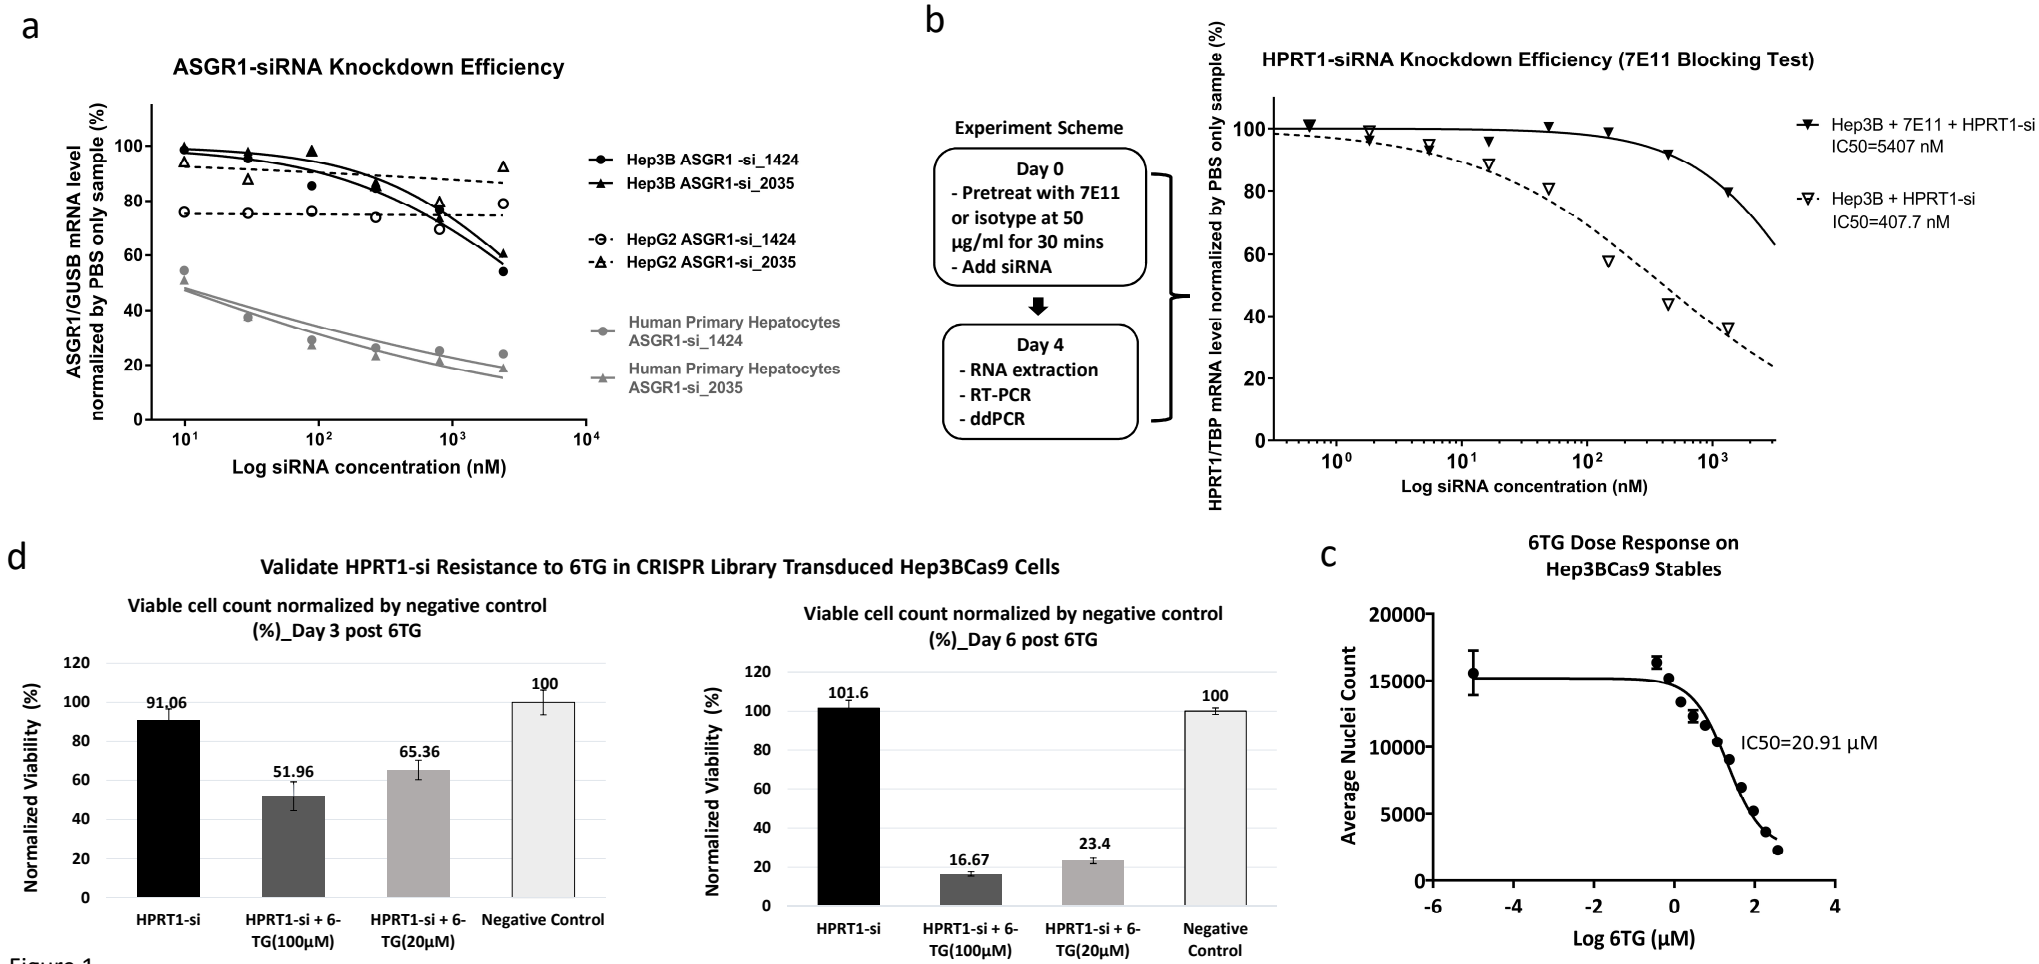

Figure 1

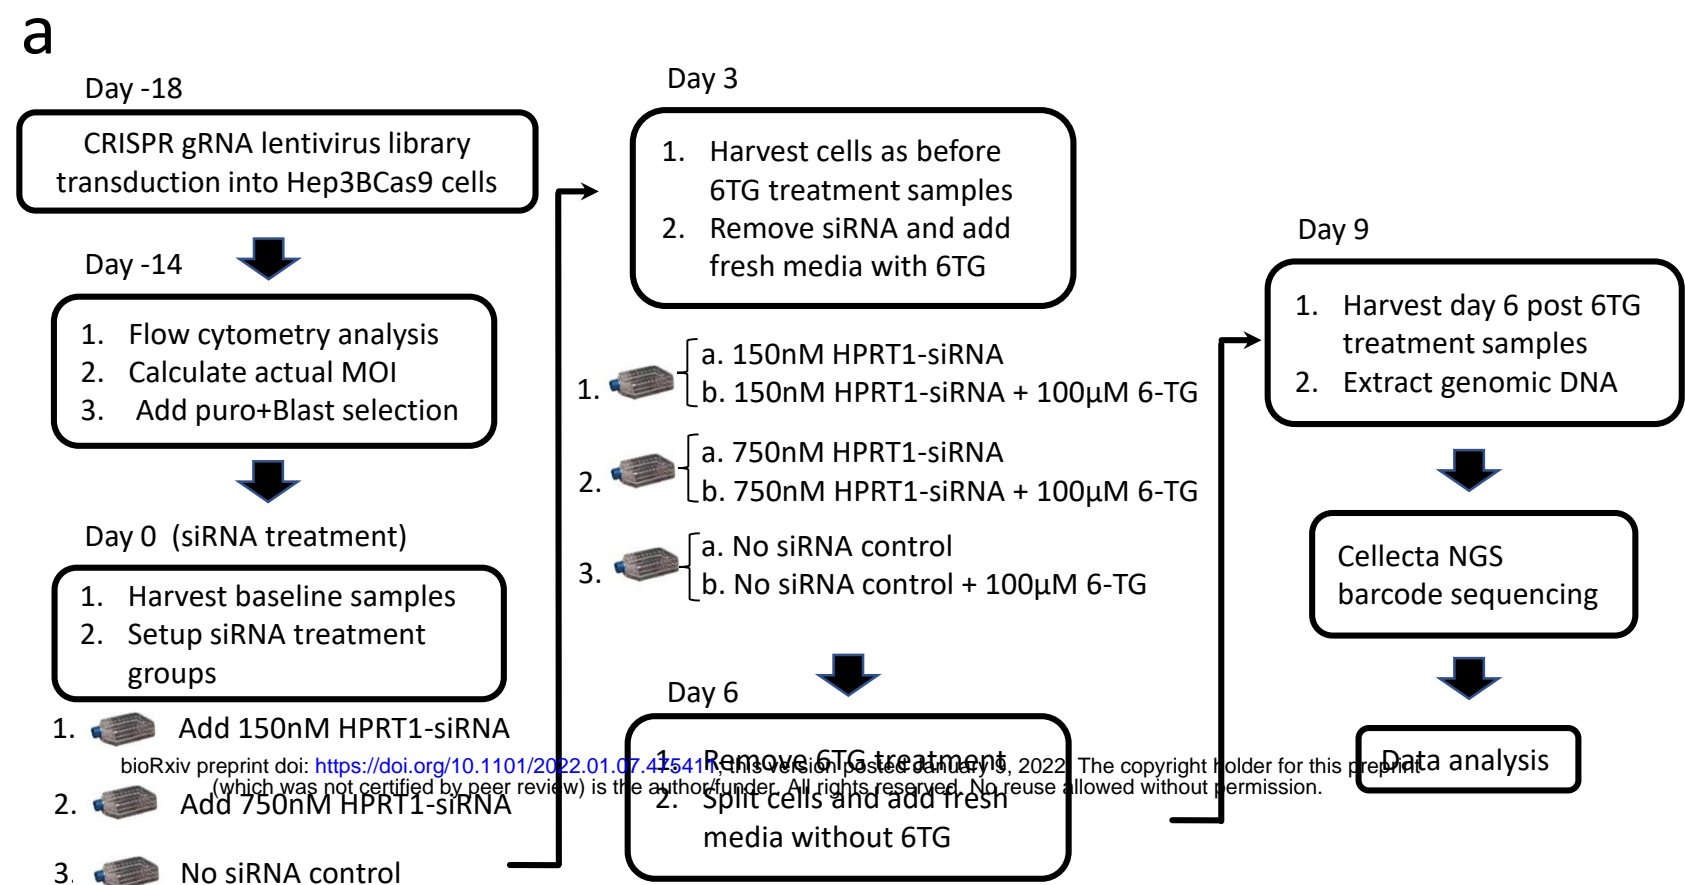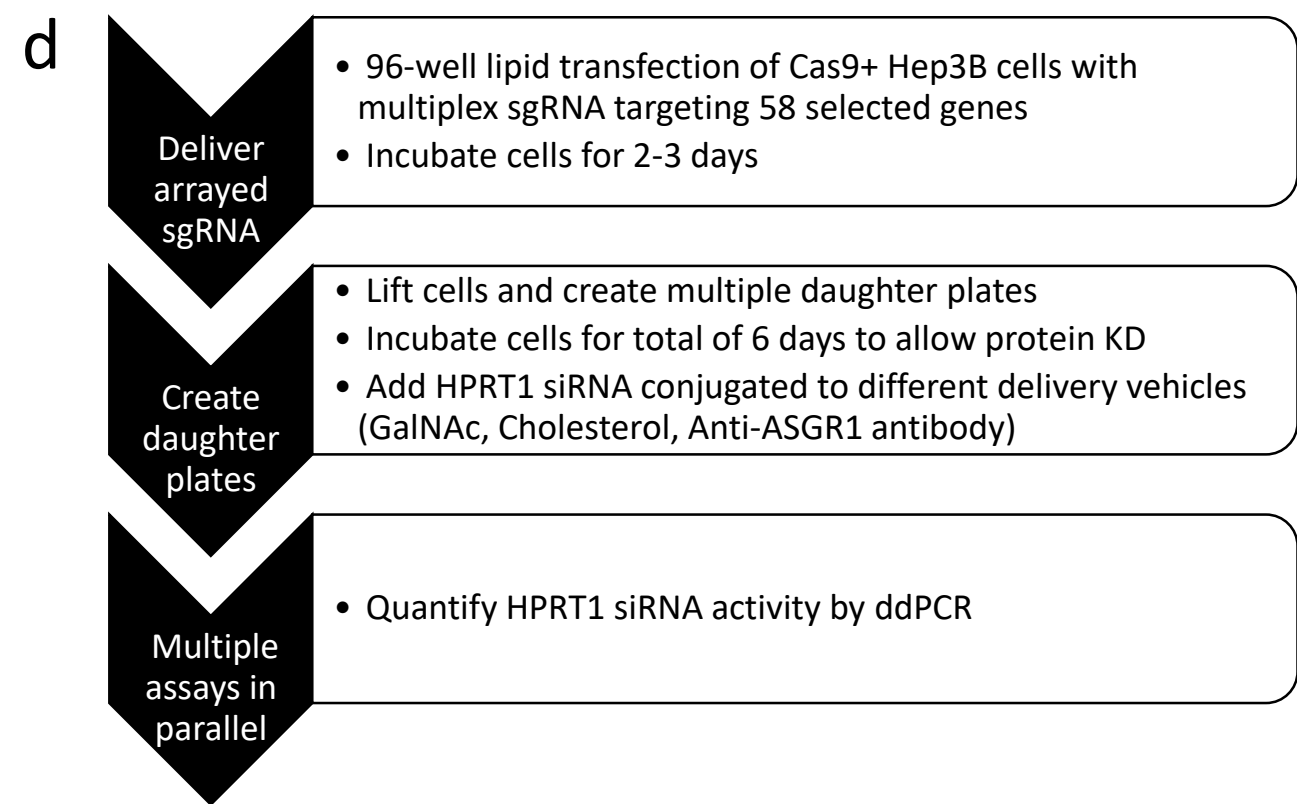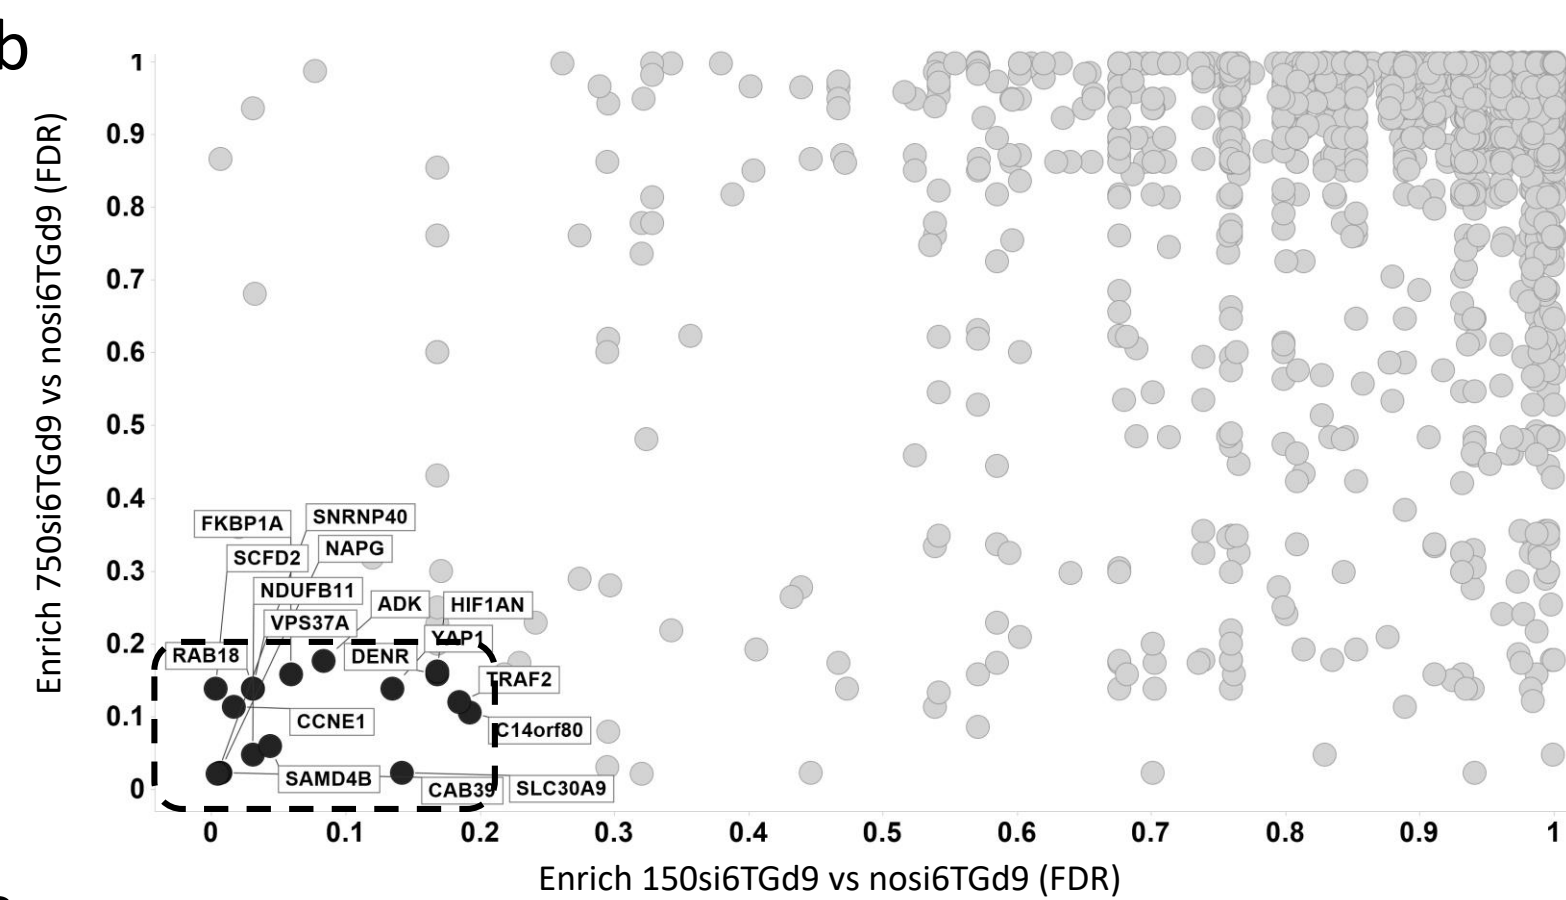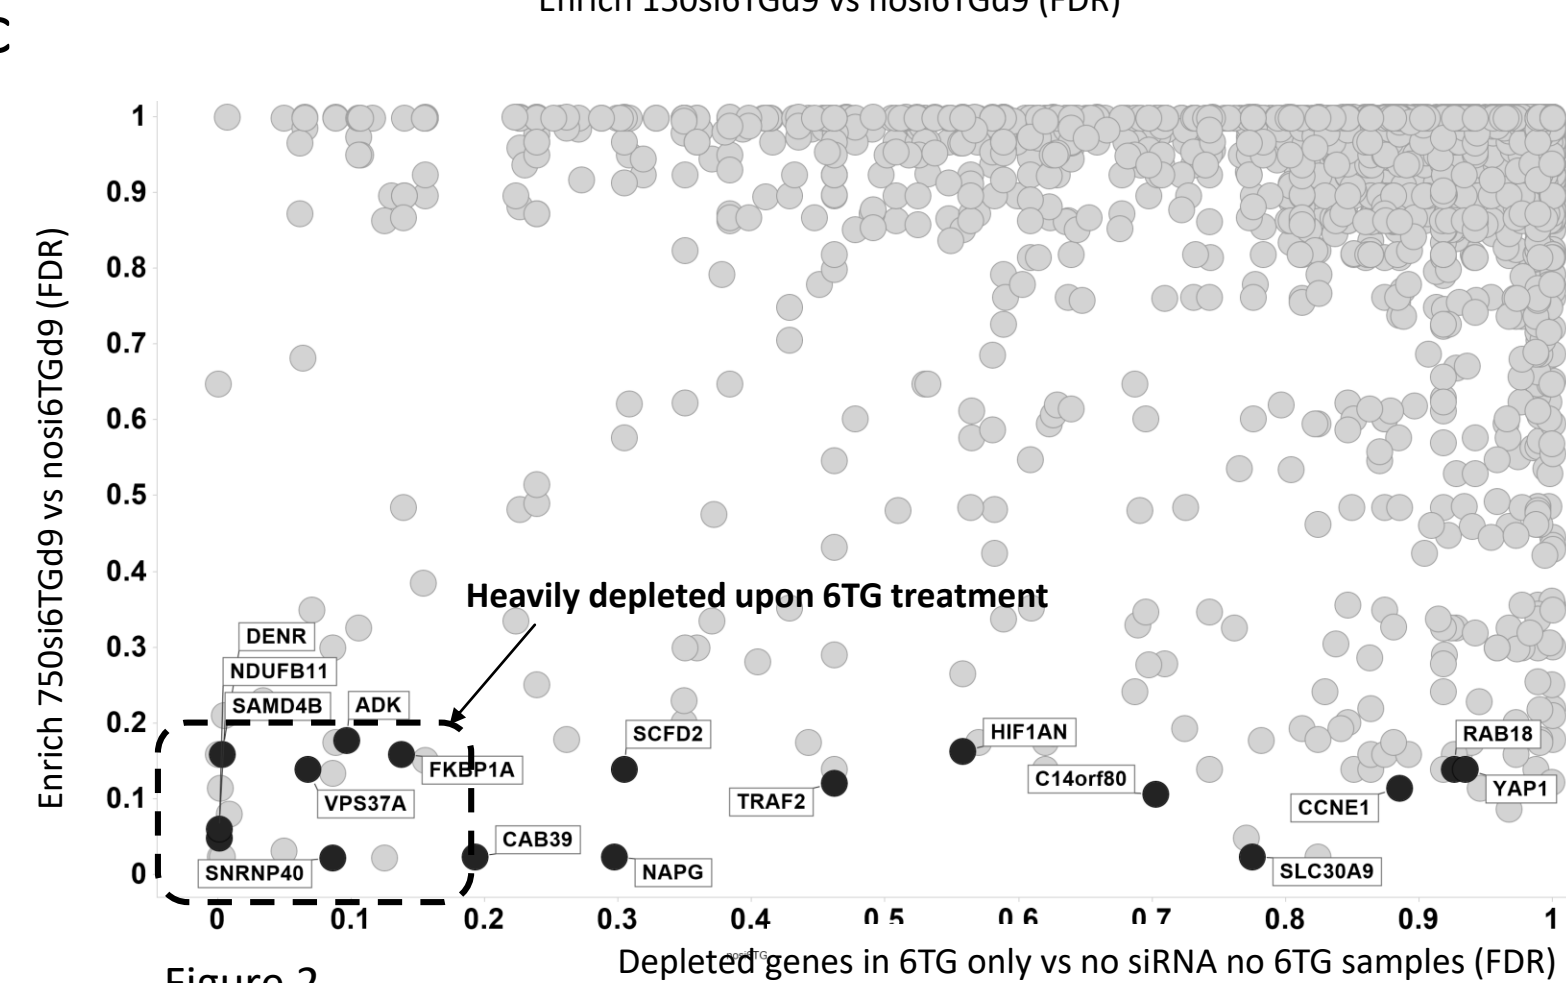

**e**

Normalized HPRT1 mRNA level (%)

| siRNA ID            | 8172    | 8172    | 8172   | 17102       | 6709                |
|---------------------|---------|---------|--------|-------------|---------------------|
| Conjugate Format    | GalNAc  | GalNAc  | GalNAc | Cholesterol | Anti-ASGR1 Antibody |
| siRNA Concentration | (500nM) | (100nM) | (20nM) | (100nM)     | (100nM)             |
| Gene Knockout       |         |         |        |             |                     |
| SCFD2               | 13.7    | 21.0    | 41.2   | 23.9        | 21.9                |
| ZW10                | 15.7    | 26.1    | 45.9   | 27.6        | 31.5                |
| RAB18               | 19.4    | 28.3    | 50.9   | 32.2        | 31.0                |
| STX18               | 24.9    | 43.2    | 70.6   | 25.9        | 45.6                |
| NAPG                | 24.9    | 33.8    | 70.3   | 30.0        | 28.4                |
| VPS37A              | 25.8    | 52.0    | 89.9   | 18.7        | 62.3                |
| SAMD4B              | 27.9    | 44.4    | 69.4   | 34.9        | 47.6                |
| Hep3BCas9_No gRNA   | 28.5    | 48.5    | 84.9   | 41.7        | 48.9                |
| CAB39               | 30.8    | 50.1    | 82.4   | 42.2        | 51.8                |
| SLC30A9             | 36.1    | 48.2    | 80.0   | 39.9        | 59.5                |
| CCNE1               | 48.9    | 57.2    | 95.0   | 39.0        | 50.6                |
| ASGR1               | 72.5    | 109.1   | 114.4  | 46.8        | 96.3                |
| ASGR2               | 83.3    | 85.6    | 140.2  | 40.2        | 78.6                |
| AGO2                | 93.5    | 108.0   | 132.3  | 104.3       | 91.2                |
| No gRNA_No siRNA    | 100.0   | 100.0   | 100.0  | 100.0       | 100.0               |

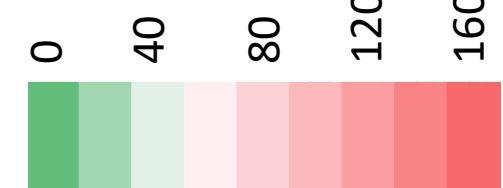

Figure 2

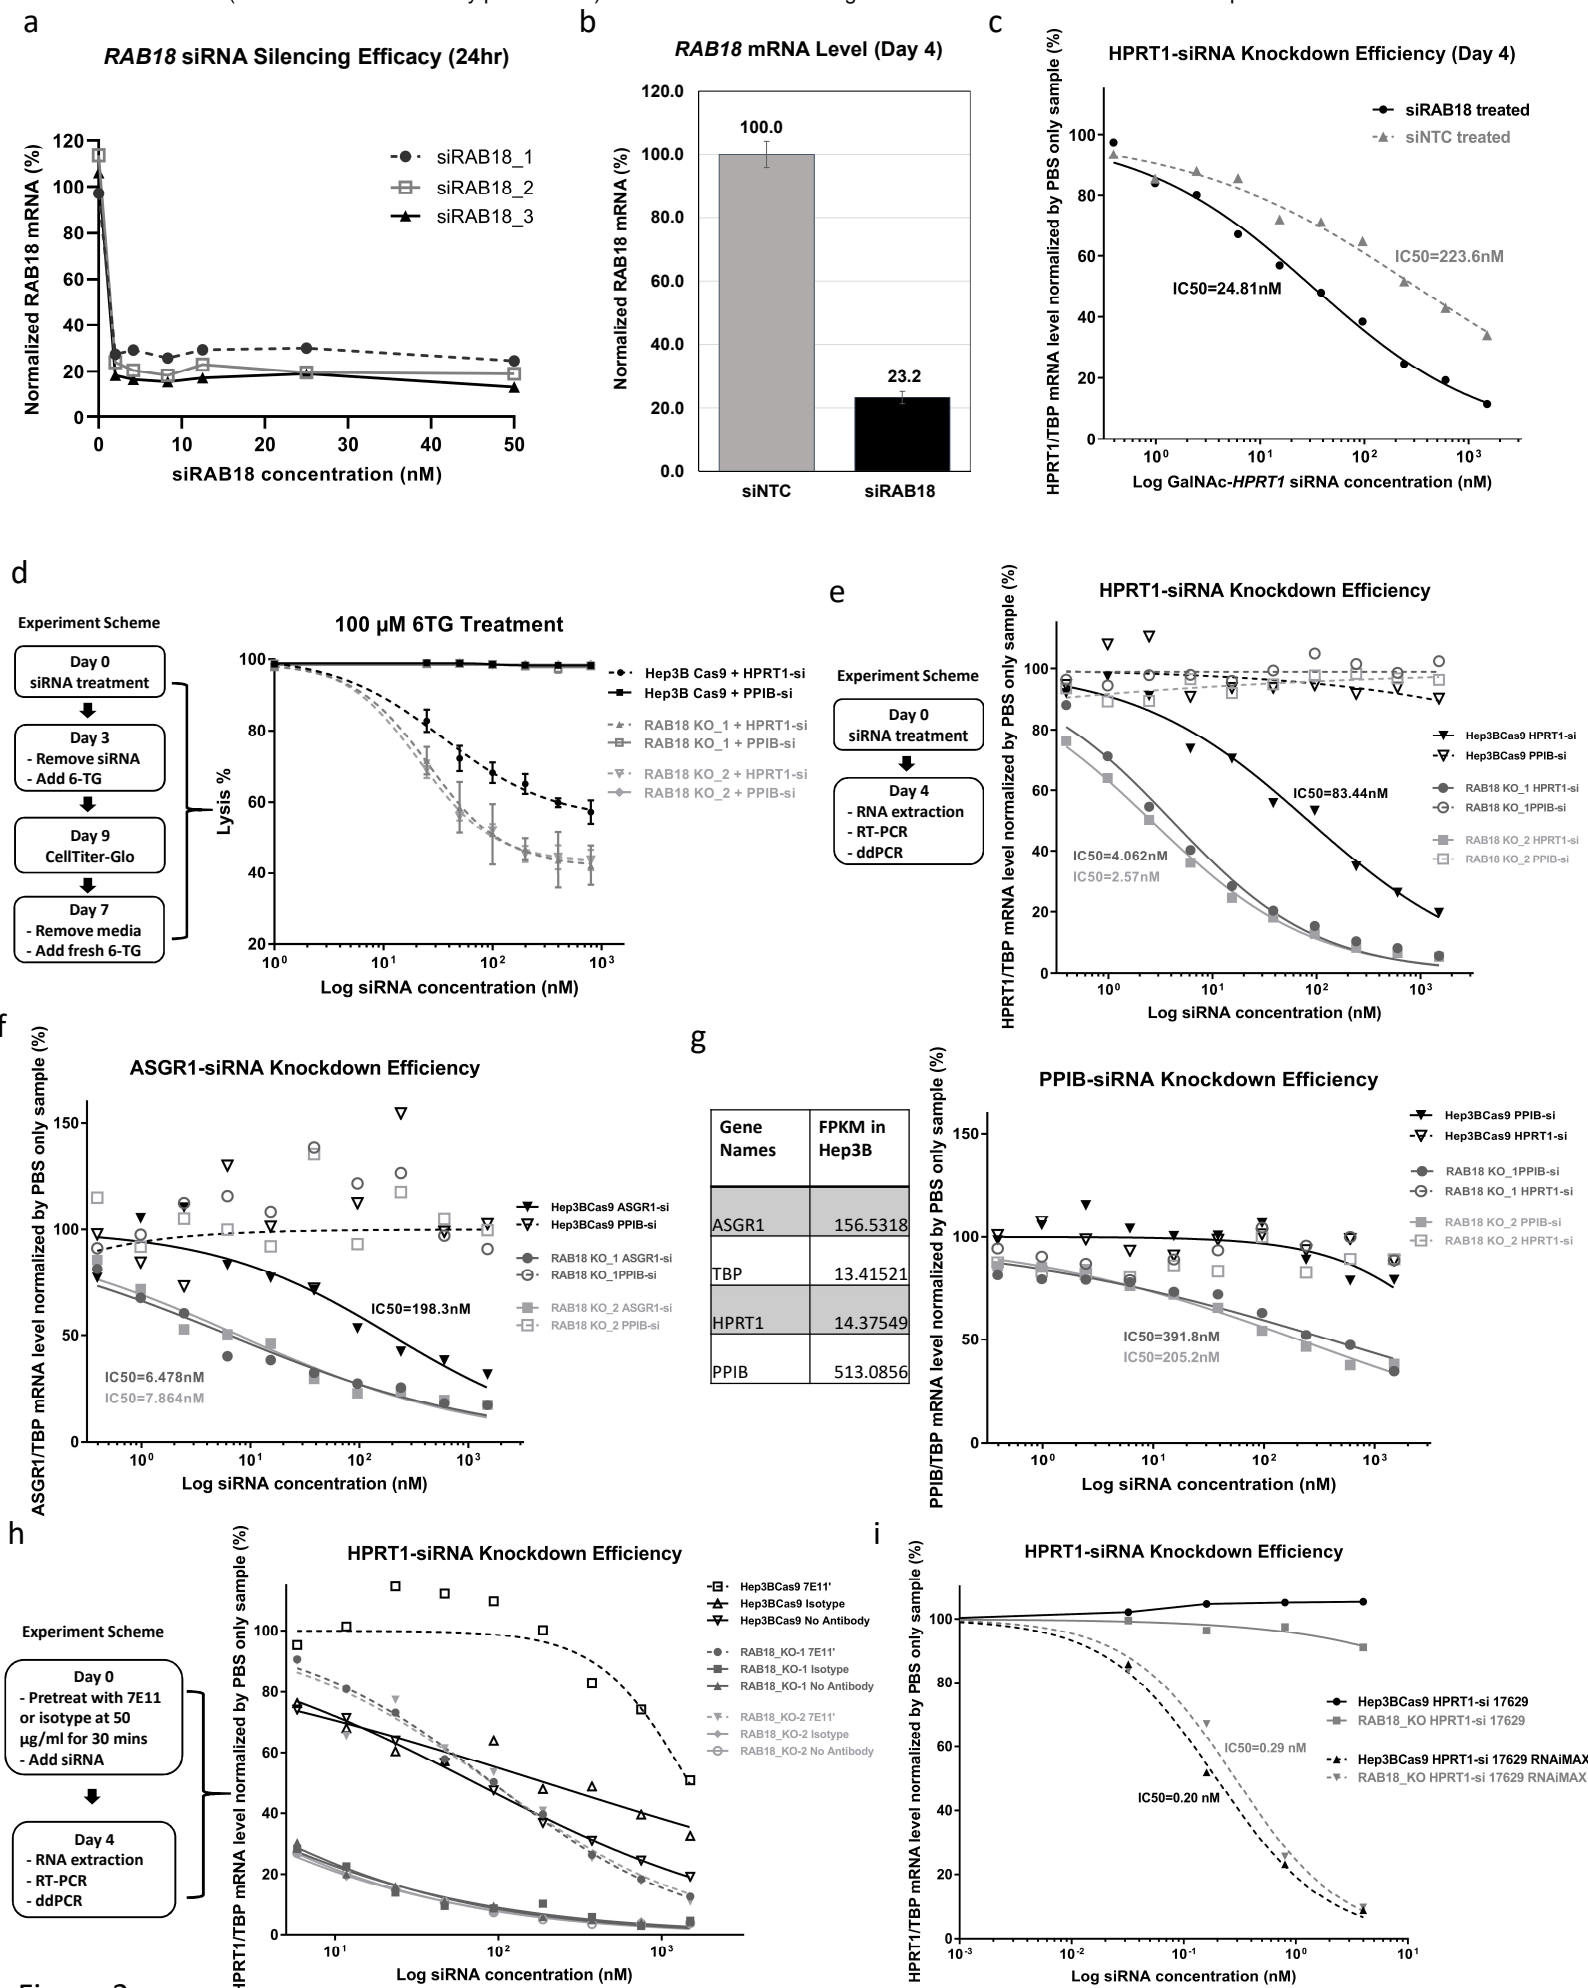

Figure 3
